# Supplementary material
Source: PubMed Central journal article supplement (PMC11580183)

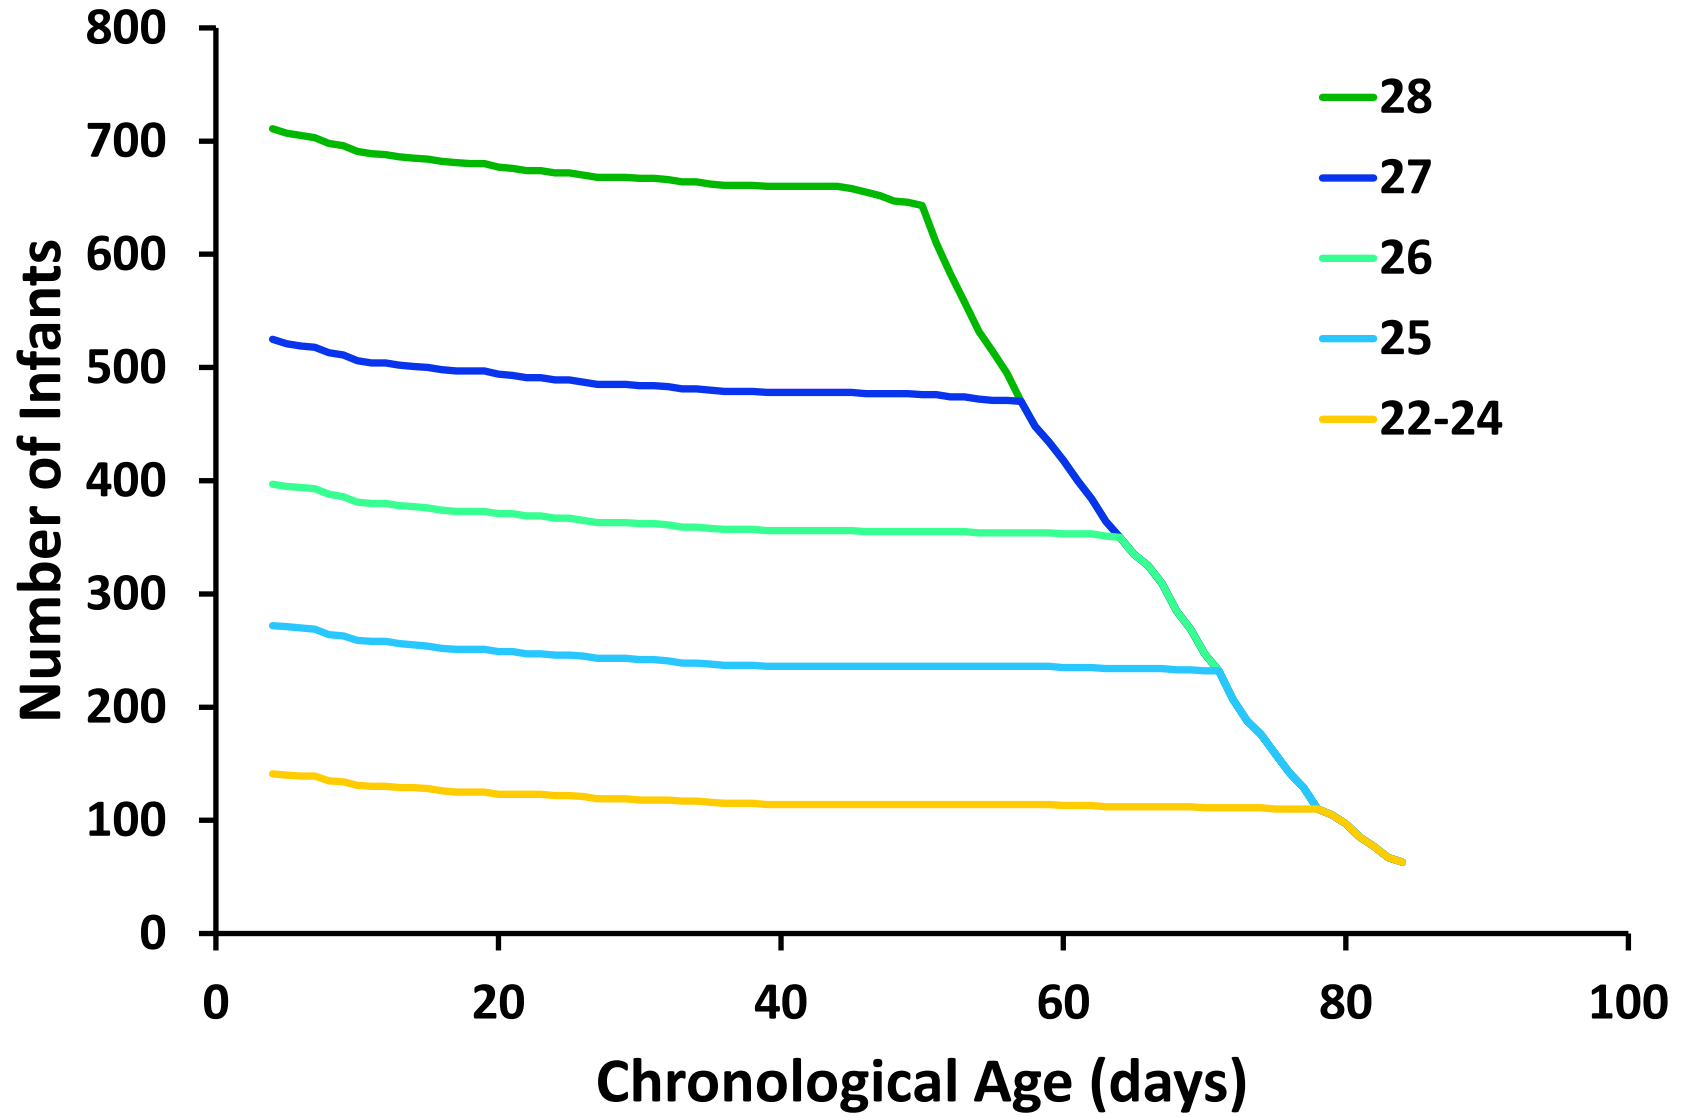

Supplement: NIHMS2031807-supplement-Supplement_Figure_4.pdf [file NIHMS2031807-supplement-Supplement_Figure_4.pdf]
